# Supplementary material for: The Nordic Maintenance Care program: Effectiveness of chiropractic maintenance care versus symptom-guided treatment for recurrent and persistent low back pain—A pragmatic randomized controlled trial
Source: PubMed Central journal article supplement (PMC6135505; doi:10.1371/journal.pone.0203029), 2018-09-12
Supplement: pone.0203029.s005.pdf [file pone.0203029.s005.pdf]

| Variable                                                       | 1 <sup>st</sup> visit,<br>n=2033 | Excluded at 1 <sup>st</sup><br>visit, n=1122 | Lost after 1 <sup>st</sup><br>visit, n=295 | 4 <sup>th</sup> visit,<br>n= 616 | Excluded at 4 <sup>st</sup><br>visit, n=176 | Lost after 4 <sup>st</sup><br>visit, n=112 | Inclusion visit,<br>n= 328 |            |
|----------------------------------------------------------------|----------------------------------|----------------------------------------------|--------------------------------------------|----------------------------------|---------------------------------------------|--------------------------------------------|----------------------------|------------|
| <b>1<sup>st</sup> visit</b>                                    |                                  |                                              |                                            |                                  |                                             |                                            |                            |            |
| LBP, % (n)                                                     | 93.9 (1910)                      | 92.1 (1033)                                  | - <sup>A</sup>                             | - <sup>A</sup>                   | - <sup>A</sup>                              | - <sup>A</sup>                             | - <sup>A</sup>             |            |
| Previous episodes of LBP in recent years, %<br>(n)             | 74.5 (1514)                      | 57.8 (648)                                   | - <sup>A</sup>                             | - <sup>A</sup>                   | - <sup>A</sup>                              | - <sup>A</sup>                             | - <sup>A</sup>             |            |
| Previous LBP in total >30 days in past year,<br>% (n)          | 54.2 (1101)                      | 25.1 (282)                                   | - <sup>A</sup>                             | - <sup>A</sup>                   | - <sup>A</sup>                              | - <sup>A</sup>                             | - <sup>A</sup>             |            |
| Pain in the thigh, % (n)                                       | 21.5 (437)                       | 21.4 (240)                                   | 22.0 (65)                                  | 21.4 (132)                       | 21.6 (38)                                   | 20.5 (23)                                  | 21.6 (71)                  |            |
| Pain in the thigh and lower leg, % (n)                         | 18.8 (382)                       | 16.6 (186)                                   | 21.4 (63)                                  | 21.6 (133)                       | 22.2 (39)                                   | 25.9 (29)                                  | 19.8 (65)                  |            |
| Pain in the lower leg, % (n)                                   | 3.5 (71)                         | 2.7 (30)                                     | 4.7 (14)                                   | 4.4 (27)                         | 5.7 (10)                                    | 6.3 (7)                                    | 3.0 (10)                   |            |
| No pain in the leg, % (n)                                      | 40.6 (826)                       | 42.2 (474)                                   | 39.3 (116)                                 | 38.3 (236)                       | 40.3 (71)                                   | 33.9 (38)                                  | 38.7 (127)                 |            |
| Never visited a chiropractor for this<br>problem before, % (n) | 53.4 (1086)                      | 55.4 (622)                                   | 49.2 (145)                                 | 51.8 (319)                       | 59.7 (105)                                  | 50.0 (56)                                  | 48.2 (158)                 |            |
| Pain in the neck and/or thoracic spine, %<br>(n)               | 49.0 (997)                       | 50.5 (492)                                   | 63.3 (159)                                 | 66.2 (346)                       | 65.2 (105)                                  | 61.4 (54)                                  | 68.2 (187)                 |            |
| Payment for<br>treatment, % (n)                                | Completely by<br>patient         | 90.6 (1672)                                  | 91.2 (886)                                 | 88.8 (261)                       | 90.5 (525)                                  | 89.6 (155)                                 | 91.3 (84.8)                | 90.8 (275) |
|                                                                | Partly by other                  | 9.4 (174)                                    | 8.8(86)                                    | 11.2 (33)                        | 9.5 (55)                                    | 10.4 (18)                                  | 8.7 (9)                    | 9.2 (28)   |

|                                                                                                |                          |                         |                         |                         |                         |                        |                         |
|------------------------------------------------------------------------------------------------|--------------------------|-------------------------|-------------------------|-------------------------|-------------------------|------------------------|-------------------------|
| Treatment payed completely by other, %<br>(n)                                                  | 5.4 (109)                | 9.4 (105)               | - <sup>B</sup>          | - <sup>B</sup>          | - <sup>B</sup>          | - <sup>B</sup>         | - <sup>B</sup>          |
| Patient believes that the pain will get<br>better 0-10 (No chance - Very likely), mean<br>(SD) | 8.1 (2.1)                | 8.4 (2.0)               | 7.5 (2.3)               | 7.9 (2.1)               | 7.13 (2.3)              | 8.0 (1.9)              | 8.28 (1.9)              |
| Lives alone, % (n)                                                                             | 12.7 (258)               | 12.5 (140)              | 14.6 (43)               | 12.2 (75)               | 11.9 (21)               | 8.9 (10)               | 13.4 (44)               |
| MPI cluster ID / DYS / AC, % (n)                                                               | 22.2/41.8/36.1<br>(1566) | 19.3/45.2/35.5<br>(825) | 29.2/36.4/34.3<br>(236) | 23.6/38.6/37.8<br>(505) | 20.7/32.0/47.3<br>(150) | 25.3/48.4/26.3<br>(95) | 24.6/38.8/36.5<br>(260) |
| Pain severity (MPI) 0-6, mean (SD)                                                             | 3.4 (1.2)                | 3.5 (1.3)               | 3.5 (1.1)               | 3.3 (1.2)               | 3.2 (1.3)               | 3.7 (1.1)              | 3.3 (1.1)               |
| Interference (MPI) 0-6, mean (SD)                                                              | 2.9 (1.4)                | 2.9 (1.4)               | 2.9 (1.3)               | 2.8 (1.3)               | 2.6 (1.3)               | 3.1 (1.2)              | 2.8 (1.4)               |
| Life control (MPI) 0-6, mean (SD)                                                              | 3.5 (1.2)                | 3.5 (1.2)               | 3.4 (1.1)               | 3.5 (1.1)               | 3.7 (1.0)               | 3.3 (1.1)              | 3.5 (1.1)               |
| Affective distress (MPI) 0-6, mean (SD)                                                        | 2.6 (1.4)                | 2.5 (1.5)               | 2.9 (1.4)               | 2.7 (1.4)               | 2.6 (1.4)               | 2.9 (1.3)              | 2.7 (1.3)               |
| Support (MPI) 0-6, mean (SD)                                                                   | 4.0 (1.7)                | 4.1 (1.7)               | 3.7 (1.7)               | 3.9 (1.7)               | 3.7 (1.7)               | 4.1 (1.6)              | 4.0 (1.7)               |
| Punishing responses (MPI) 0-6, mean (SD)                                                       | 0.9 (1.1)                | 0.9 (1.1)               | 1.1 (1.2)               | 1.0 (1.2)               | 0.85 (1.0)              | 1.1 (1.2)              | 1.0 (1.3)               |
| Solicitous responses (MPI) 0-6, mean (SD)                                                      | 2.8 (1.4)                | 3.0 (1.4)               | 2.6 (1.4)               | 2.6 (1.4)               | 2.5 (1.3)               | 2.9 (1.5)              | 2.6 (1.4)               |
| Distracting responses (MPI) 0-6, mean (SD)                                                     | 2.9 (1.4)                | 2.9 (1.4)               | 2.8 (1.4)               | 2.8 (1.5)               | 2.8 (1.6)               | 2.8 (1.4)              | 2.8 (1.4)               |
| Pain intensity at 1st visit (first measure) 0-<br>10, mean (SD)                                | 5.6 (2.2)                | 5.7 (2.3)               | 5.6 (1.4)               | 5.38 (2.1)              | 5.24 (2.1)              | 5.9 (2.0)              | 5.3 (2.1)               |
| EQ5D score baseline, mean (SD)                                                                 | 0.67 (0.3)               | 0.66 (0.2)              | 0.66 (0.2)              | 0.69 (0.2)              | 0.70 (0.2)              | 0.64 (0.2)             | 0.69 (0.2)              |
| Excellent                                                                                      | 8.0 (163)                | 10.4 (117)              | 3.4 (10)                | 5.8 (36)                | 5.1 (9)                 | 8.9 (10)               | 5.2 (17)                |
